# Supplementary material for: Reduction behaviors of tin oxides and oxyhydroxides during electrochemical reduction of carbon dioxide in an aqueous solution under neutral conditions
Source: Royal Society of Chemistry journal article supplement (doi:10.1039/d4su00476k), 2025-01-01
Supplement: d4su00476k1.pdf [file d4su00476k1.pdf]

Supplementary Information to:

**Reduction Behaviors of Tin Oxides and Hydroxides Itself during Electrochemical  
Reduction of Carbon Dioxide in an Aqueous Solution under Neutral Conditions**

Etsushi Tsuji,<sup>a\*</sup> Kaede Ohwan,<sup>a</sup> Tomoki Ishikawa,<sup>a</sup> Yuki Hirata,<sup>a</sup> Hiroyuki Okada,<sup>a</sup> Satoshi Suganuma

<sup>a,b</sup> and Naonobu Katada <sup>a</sup>

a) Center for Research on Green Sustainable Chemistry, Tottori University, 4-101 Koyama-cho  
Minami, Tottori 680-8552, Japan.

b) Institute for Catalysis, Hokkaido University, Kita21, Nishi10, Kita-ku, Sapporo 001-0021, Japan.

\* E-mail: e-tsuji@tottori-u.ac.jp, Tel./Fax: +81 (857) 31-5257

CONTENTS

**Appendix Experimental Section**

**Figure S1** TEM of P-SNO before CO<sub>2</sub>RR.

**Figure S2** XPS spectra of Sn3p of ST-SNO, SG-SNO and P-SNO before CO<sub>2</sub>RR.

**Figure S3** STEM and HR-TEM images of SnO<sub>2</sub> ultrasmall particles before the reduction reaction.

**Figure S4** STEM and EDS mapping of nanoparticles formed by reduction of SnO<sub>2</sub> ultrasmall particles after CO<sub>2</sub>RR.

## Appendix Experimental Section

**Preparation of a metallic Sn electrode.** A metallic Sn electrode was prepared by an electrodeposition method. A specimen used for electrodeposition comprised 99.5% pure titanium sheets of 0.5 mm thickness. The specimen was electropolished in 1 mol dm<sup>-3</sup> NaCl/ethylene glycol solution at 293 K at 20 V for 200 s and, subsequently, at 10 V for 600 s. Electrodeposition was carried out using a normal three-electrode system with a commercial potentiostat and potential programmer (Toho Technical Research Co., Ltd., Model PS-04). A platinum foil (1.5 × 1.5 cm<sup>2</sup>) and Ag/AgCl/KCl (satd.) were used as counter and reference electrodes, respectively. The electropolished specimen was immersed in 5 mmol dm<sup>-3</sup> SnCl<sub>2</sub> aqueous solution, then, applied potential at -1.2 V vs. RHE for 30 min. The lateral and back sides of the obtained Sn/Ti electrode was covered with epoxy resin for insulation (effective area is 1.0×1.0 cm<sup>2</sup>).

**Synthesis of SnO<sub>2</sub> ultrasmall particles.** SnO<sub>2</sub> ultrasmall particles loaded on acetylene black nanoparticles were prepared by a reverse micelles deposition (RMD)<sup>1</sup> and following solvothermal method. SnCl<sub>2</sub>·2H<sub>2</sub>O (Fujifilm Wako Pure Chemical Corp. 97.0%) was used as starting materials. 1.0 cm<sup>3</sup> of SnCl<sub>2</sub> aqueous solution was stirred with cyclohexane (18.0 g, FUJIFILM Wako Pure Chemical Corp., 99.5%) and hexaethyleneglycol nonyl phenyl ether (9.0 g, NP-6, DKS Co. Ltd.) as a surfactant at 283 K for 30 min to obtain a RM solution containing metal cations (RM-A). Another RM solution (RM-B) was also prepared from cyclohexane (54.0 g), NP-6 (27.0 g) and 10% tetramethylammonium hydroxide (TMAH) aqueous solution (3.0 cm<sup>3</sup> g, KISHIDA CHEMICAL Co. Ltd.). The molar ratios of water to surfactant and cyclohexane to surfactant in the all RM solutions were 3, respectively. RM-A and RM-B were mixed and agitated at 283 K for 1 h, then stirred again by ultra-sonication, and the thus obtained final solution was named as RM-AB. acetylene carbon black powder (AB, 41 mg, STREM Chemicals, Inc.) dispersed in 100 cm<sup>3</sup> of cyclohexane and 200 cm<sup>3</sup> of ethanol were added into RM-AB and the suspension was mixed by a magnetic stirrer at 550 rpm for 1 h. Finally, the formed solid was collected by centrifugation at 10000 rpm, dried at 383 K for overnight in air. The obtained powders were dispersed mixed solution of ion-exchanged water and propylene glycol (Fujifilm Wako Pure Chemical Corp. 99.0%) (1 : 1 volume ratio). The suspension was put into a batch autoclave reactor and heated at 433 K for 3 h without stirring. After reaction, the suspension was cooled with water, and the solid was collected by centrifugation at 4000 rpm and dried at 383 K for overnight.

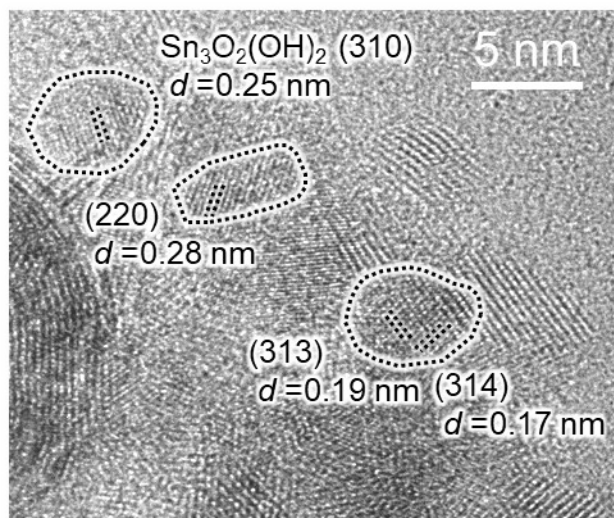

**Figure S1** the high-resolution TEM image of P-SNO before constant potential measurements at -0.8 V vs. RHE in  $\text{CO}_2$  saturated  $\text{NaHCO}_3$  aqueous solution.

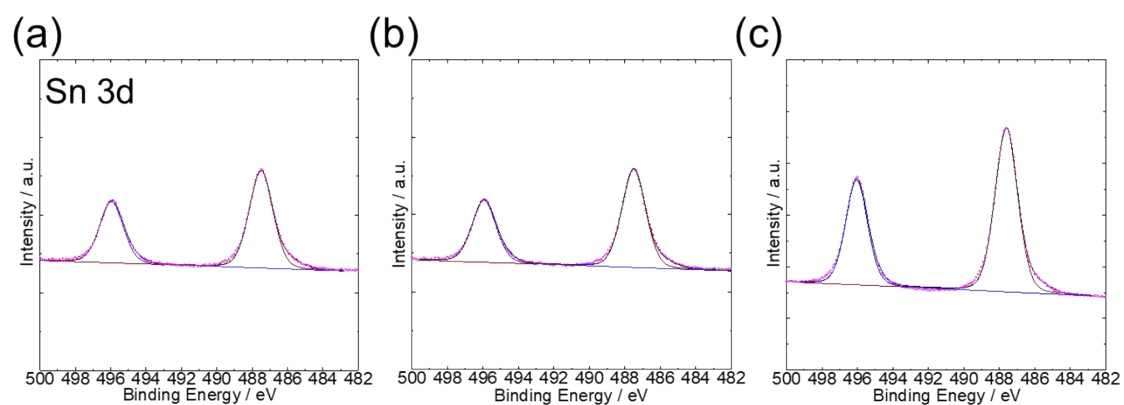

**Figure S2** XPS spectra of Sn3d of (a) ST-SNO, (b) SG-SNO and (c) P-SNO/carbon paper electrodes before constant potential measurements at -0.8 V vs. RHE in CO<sub>2</sub> saturated NaHCO<sub>3</sub> aqueous solution.

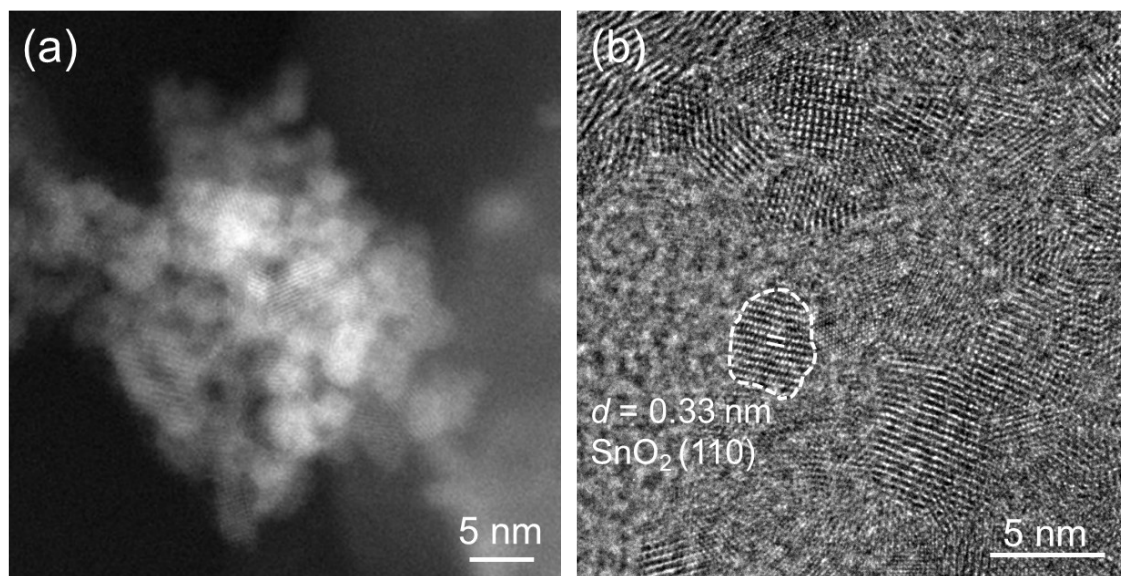

**Figure S3** (a) STEM and (b) high-resolution TEM images of  $\text{SnO}_2$  ultrasmall particles synthesized on acetylene black by the RMD and solvothermal method. Particle size is less than 5 nm.

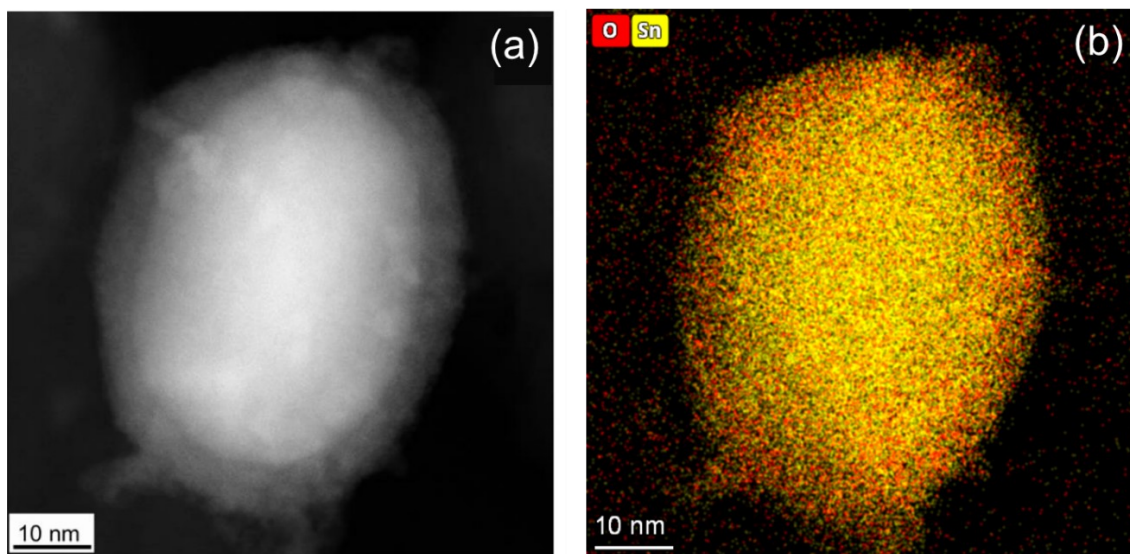

**Figure S4** (a) STEM and (b) EDS mapping of reduced nanoparticles, which was formed by reduction of  $\text{SnO}_2$  ultrasmall particles during  $\text{CO}_2\text{RR}$  at  $-0.8$  V vs. RHE. The particle is core-shell structures, and particle size is about  $40 \sim 50$  nm. The particles were quite similar to that formed by reduction of  $\text{SnO}_2$  nanoparticles and the tin oxyhydroxide containing amorphous phase and crystalline  $\text{Sn}_3\text{O}_2(\text{OH})_2$  shown in the main manuscript.
